# Supplementary material
Source: publisher site journal article supplement (http://static.cambridge.org/content/id/urn:cambridge.org:id:article:S001675681800078X/resource/name/S001675681800078Xsupp001.xlsx)
Supplement: Supplementary file 1 [file S001675681800078Xsupp001.xlsx]

## Sheet: Table 1
Geological Magazine,Modelling the partial melting of meta-sediments in low pressure regional contact aureole: the effect of water and whole rock composition,Wei-(RZ) Wang, Geoffrey Clarke, Nathan R. Daczko, Yue Zhao,Supplementary Material.
Supplementary Table S1.
Sample	Rock type	SiO2	TiO2	Al2O3	Fe2O3T	MnO	MgO	CaO	Na2O	K2O	P2O5	LOI	TOTAL	Fe2O3T+MgO	CaO+Na2O+K2O	Zone	Source
		(%)	(%)	(%)	(%)	(%)	(%)	(%)	(%)	(%)	(%)	(%)	(%)	(%)	(%)
ST1113B	pelite	56.31	0.61	25.65	5.52	0.05	2.09	0.27	0.92	6.35	0.13	1.6	99.5	7.61	7.54	1	*
ST1118B	pelite	59.44	0.69	21.79	5.41	0.07	1.85	0.78	1.73	7.02	0.12	0.52	99.41	7.26	9.53	1	*
ST1119A	semipelite	67.68	0.54	17.36	5.34	0.04	1.74	0.24	0.77	5.14	0.12	0.7	99.67	7.08	6.15	1	*
ST1114A	psammite	58.02	0.57	24.45	6.31	0.05	2.13	0.2	0.77	6.33	0.13	0.92	99.88	8.44	7.3	1	*
ST1120B	psammite	76.19	0.45	12.05	4.06	0.04	1.21	0.52	1.24	3.48	0.09	0.5	99.83	5.27	5.24	1	*
ST1119B	psammite	74.21	0.46	13.16	4.51	0.03	1.39	0.48	1.07	3.65	0.11	0.7	99.77	5.9	5.2	1	*
GC5	psammite	47.4	1.04	14.99	14.1	0.21	8.57	10.34	1.58	0.17	0.08	1.07	99.56	22.67	12.09	1	#
1107Pe	semipelite	68.57	0.56	17.21	5.42	0.12	1.69	0.18	0.52	4.49	0.08	0.95	99.79	7.11	5.19	1	#
GC6	psammite	78.81	0.37	11.09	3.06	0.03	1.14	0.14	0.15	3.6	0.06	1.78	100.23	4.2	3.88	1	#
1107 Ps	psammite	70.84	0.5	12.46	6.75	0.12	1.59	0.15	0.62	3.8	0.08	1.3	98.2	8.34	4.56	1	#
ST10-03B	psammite	77.44	0.4	11.13	3.3	0.06	1.02	1	1.27	3.26	0.1	1.14	100.11	4.31	5.53	2	*
ST10-03C	semipelite	66.99	0.66	15.58	6.41	0.07	1.88	0.2	0.58	4.9	0.04	2.12	99.44	8.29	5.68	2	*
ST10 04A	psammite	78.24	0.41	10.79	3.52	0.03	0.98	0.86	1.34	2.75	0.1	0.52	99.54	4.5	4.95	2	*
ST10 04B	semipelite	68.29	0.56	16.51	5.36	0.03	1.66	0.21	1.01	5.11	0.12	0.94	99.8	7.02	6.33	2	*
ST10 05A	pelite	56.76	0.5	24.33	5.93	0.07	1.95	0.7	1.95	6.48	0.15	0.64	99.46	7.88	9.13	2	*
ST10 05B	semipelite	68.22	0.6	17.2	5.8	0.04	1.7	0.36	0.96	4.57	0.16	0.58	100.19	7.5	5.89	2	*
ST1121A	psammite	80.54	0.31	9.55	2.58	0.03	0.81	1.31	2.17	1.66	0.06	0.38	99.4	3.39	5.14	2	*
ST1123A2	psammite	77.45	0.42	11.62	6.64	0.04	1.8	0.25	0.24	0.85	0.12	1.06	100.49	8.44	1.34	2	*
ST1124A	psammite	73.63	0.45	12.38	3.96	0.03	1.15	0.43	1.58	4.99	0.09	0.72	99.41	5.11	7	2	*
ST1124B	psammite	74.66	0.59	13.51	3.24	0.03	1.39	0.59	1.57	3.51	0.14	0.58	99.81	4.63	5.67	2	*
ST1123A1	pelite	57.15	0.67	23.39	6.66	0.06	1.93	0.45	1.3	7.09	0.14	0.74	99.58	8.59	8.84	2	*
ST1122A	pelite	61.52	0.64	21.18	6.42	0.05	2.08	0.26	1	5.74	0.13	0.54	99.56	8.5	7	2	*
182L	pelite	56.6	0.68	23.84	7.25	0.08	2.32	0.23	1.11	6.61	0.13	1.7	100.55	9.57	7.95	2a	#
1109Pe	pelite	55.6	0.72	24.73	6.75	0.07	2.32	0.29	0.94	7.01	0.15	1.1	99.67	9.07	8.24	2a	#
1109Spe	semipelite	61.44	0.71	19	6.33	0.06	1.94	0.28	0.93	6.39	0.13	0.9	98.11	8.27	7.61	2a	#
1109A	pelite	59.95	0.71	22.73	6.07	0.05	2.16	0.34	0.95	6.61	0.14	0.92	100.63	8.23	7.89	2a	#
182M	pelite	60.4	0.75	20.89	7.89	0.09	2.52	0.18	0.86	4.46	0.13	1.65	99.82	10.41	5.5	2a	#
1109EGPs	semipelite	62.79	0.63	16.96	6.03	0.06	1.77	0.56	1.23	6.78	0.13	1	97.94	7.8	8.57	2a	#
1112pe	pelite	53.71	0.76	28.26	6.73	0.14	2.4	0.95	1.45	4.89	0.18	0.64	100.11	9.13	7.29	2c	#
1109B	semipelite	65.83	0.54	15.84	5.26	0.04	1.83	0.47	1.19	6.76	0.14	0.95	98.84	7.09	8.42	2a	#
144	psammite	72.9	0.52	13.91	4.67	0.05	1.23	0.2	0.97	4.28	0.12	1.45	100.3	5.9	5.45	2b	#
1112ps	psammite	71.79	0.57	13.32	5.97	0.07	1.94	0.59	0.87	4.22	0.1	0.59	100.01	7.91	5.68	2c	#
ST1008A	psammite	78.04	0.44	11.29	3.69	0.04	1.14	0.59	0.96	3.53	0.1	0.46	100.27	4.83	5.08	3	*
ST1008B	pelite	59.13	0.59	22.38	5.8	0.06	1.94	0.52	1.67	6.9	0.15	0.78	99.92	7.75	9.09	3	*
ST1106B	semipelite	66.39	0.61	18.13	6.51	0.05	1.88	0.2	0.95	4.14	0.1	1.28	100.24	8.39	5.29	3	*
ST1106C	pelite	58.25	0.65	23.5	7.65	0.06	2.47	0.38	1.19	5.19	0.12	0.68	100.14	10.12	6.76	3	*
ST1107C	pelite	61.27	0.65	20.48	6.16	0.06	2	0.36	1.26	6.09	0.1	1.06	99.49	8.16	7.71	3	*
ST1108B	pelite	59.73	0.69	21.83	5.41	0.07	1.84	0.79	1.75	7.07	0.12	0.56	99.86	7.25	9.61	3	*
ST1107A	psammite	75.8	0.51	12.69	4.73	0.04	1.44	0.16	0.72	3.22	0.08	0.86	100.25	6.17	4.1	3	*
ST1108A	psammite	84.21	0.33	8.02	1.67	0.02	0.61	0.52	1.18	2.88	0.08	0.46	99.98	2.28	4.58	3	*
ST1118A	psammite	76.63	0.54	11.94	4.71	0.07	1.51	0.81	0.88	2.33	0.09	0.44	99.95	6.22	4.02	3	*
9115-M	mesosome	57.9	1.29	18.29	12.25	0.13	3.73	0.31	0.32	3.05	0.08	0.69	98.04	15.98	3.68	4	#
9115-L	Leucosome	57.62	0.85	20.63	8.45	0.09	2.69	0.32	0.95	5.74	0.1	0.83	98.27	11.14	7.01	4	#
ST1013A	pelite	58.77	0.67	22.37	7.44	0.07	2.26	0.33	1.43	5.91	0.12	0.58	99.95	9.7	7.67	4	*
ST1013B-L	leucosome	57.87	0.66	22.65	7.05	0.05	2.01	0.31	1.63	6.69	0.13	0.66	99.71	9.06	8.63	4	*
ST1013B-M	melanosome	51.96	1.29	25.41	15.84	0.12	4.28	0.14	0.15	0.76	0.07	0.5	100.52	20.12	1.05	4	*
GC1-L	Leucosome	56.69	0.74	22.78	8.39	0.06	2.59	0.69	1.37	4.86	0.1	0.62	98.89	10.98	6.92	4	#
49	pelite	51.19	0.89	24.88	10.19	0.07	3.02	0.04	0.12	5.74	0.06	2.96	99.16	13.21	5.9	4	#
JG9334	pelite	55.33	0.74	23.4	8.58	0.07	2.81	0.21	0.91	6.6	0.12	0.52	99.29	11.39	7.72	4	#
9327	pelite	50.59	0.97	28.42	9.94	0.09	4.12	2.31	1.3	1.3	0.07	0.4	99.51	14.06	4.91	4	#
1190f-1-M	mesosome	52.66	1.29	24.5	13.35	0.18	3.92	0.2	0.17	1.2	0.07	0.52	98.06	17.27	1.57	4	#
1190f-1-L	Leucosome	57.71	0.74	21.76	7.22	0.08	2.12	0.3	1.05	6.11	0.1	0.8	97.99	9.34	7.46	4	#
1190f-2-L	Leucosome	55.94	0.81	22.59	8.85	0.07	2.57	0.25	0.88	5.1	0.12	0.82	98	11.42	6.23	4	#
9303jg-L	Leucosome	55.97	0.76	23.2	8.45	0.04	2.45	0.23	0.81	5.95	0.11	0.66	98.63	10.9	6.99	4	#
9344jg	pelite	56.81	0.95	21.53	9.7	0.08	3.01	0.25	0.7	4.47	0.11	0.65	98.26	12.71	5.42	4	#
9303jg-M	mesosome	58.87	1.11	21.56	11.34	0.06	3.3	0.09	0.01	1.05	0.06	0.67	98.12	14.64	1.15	4	#
JG9357a-M	mesosome	78.93	0.48	9.87	3.56	0.04	0.86	0.75	0.87	2.07	0.05	0.78	98.26	4.42	3.69	4	#
JG9357a-L	Leucosome	72.36	0.05	14.55	1.08	0.01	0.07	0.52	1.76	7.11	0.25	0.59	98.35	1.15	9.39	4	#
1190f-2-ML	melanosome	58.83	1.01	21.6	10.65	0.1	3.05	0.14	0.18	1.8	0.07	0.71	98.14	13.7	2.12	4	#
